# Supplementary material for: Density functional theory study of hydrophobic zeolites for the removal of triclosan from aqueous solution
Source: Royal Society of Chemistry journal article supplement (doi:10.1039/d3va00078h), 2023-01-01
Supplement: d3va00078h1.pdf [file d3va00078h1.pdf]

## Density functional theory study of hydrophobic zeolites for the removal of triclosan from aqueous solution

**Michael Fischer**

Crystallography & Geomaterials Research, Faculty of Geosciences, University of Bremen,  
Klagenfurter Straße 2-4, 28359 Bremen, Germany

Bremen Center for Computational Materials Science and MAPEX Center for Materials and  
Processes, University of Bremen, 28359 Bremen, Germany

E-Mail: michael.fischer@uni-bremen.de

## SUPPORTING INFORMATION

### Index

|                                                      |     |
|------------------------------------------------------|-----|
| Further details of force field calculations          | S2  |
| Parameters of force field calculations               | S4  |
| Cell parameters of DFT-optimized zeolite structures  | S5  |
| Comparison of proton positions in H-FAU              | S5  |
| Comparison of Al sites and proton positions in H-MOR | S6  |
| Adsorption energies from DFT optimisations           | S8  |
| Additional results of AIMD simulations               | S12 |
| References                                           | S18 |

## Further details of force field calculations

### Force field parameters

Calculations addressing isolated TCS and the adsorption of TCS and/or H<sub>2</sub>O in all-silica zeolites used default *pcff* parameters. Partial charges and the parameters defining the Lennard-Jones potentials used to represent long-range attraction and short-range repulsion between atoms that are not bonded to each other are given in **Table S1**. It should be noted that *pcff* uses 9-6 Lennard-Jones potentials<sup>1</sup> and a 6<sup>th</sup>-power combination rule.<sup>2</sup> In the calculations for protonated zeolites, the charge on the framework proton was modified from the default value of +0.0839 e<sup>-</sup> to the formal charge of +1.0 e<sup>-</sup>. Although this adjustment might possibly lead to an overestimation of the electrostatic contribution, it was found that the use of a higher positive charge on the framework proton was pivotal to obtain configurations in which the negatively polarised areas of the guest molecules are located in the vicinity of the framework proton, thus constituting suitable starting points for the DFT optimisations. Both Monte Carlo (MC) and molecular dynamics (MD) simulations used an atom-based summation for Lennard-Jones potentials, employing a cutoff distance of 12.5 Å with a cubic spline truncation. Ewald summation (MD simulations) and a combination of Ewald summation and group-based summation (MC simulations) were used for electrostatic interactions.

### Monte Carlo simulations

Monte Carlo (MC) simulations were carried out using the Materials Studio (MS) *Sorption* module. The calculations were done for fixed sorbate loading at  $T = 298$  K, setting the loading to 1 TCS molecule or 8 H<sub>2</sub>O molecules per simulation cell (see main text). While the H<sub>2</sub>O molecule and the zeolite frameworks were treated as rigid entities, rotations about the three C–O bonds were included as torsional degrees of freedom. In configurational-bias MC simulations of TCS adsorption, the probability ratio of different MC moves corresponded to 3:2:1:1:1 for exchange (insertion/deletion), regrowth, intramolecular torsion, molecule translation, and molecule rotation, respectively. For H<sub>2</sub>O adsorption simulations, the probability ratio in the Metropolis sampling was 2:0.1:1:1 for exchange, regrowth, translation, and rotation. For each zeolite-guest combination, three independent simulations were run, and five low-energy snapshots were extracted manually.

### Molecular dynamics simulations

Both the MD-based simulated annealing runs to obtain starting structures for the DFT optimisations and the MD simulations of TCS diffusion used the MS *Forcite* module. Typical simulated annealing runs consisted of 20 annealing cycles, with each cycle consisting of 200,000 simulation steps (timestep 0.5 fs). All framework atoms were held fixed in these calculations. For protonated zeolites, the position of the O atom of the guest molecule closest to the framework proton was also constrained to avoid a breaking of the hydrogen bond during the simulated annealing. In order to sample different degrees of freedom of the TCS molecule, simulations of TCS@Zeo systems used an initial temperature of 300 K and a mid-cycle temperature of 1000 K. Since the use of such a high mid-cycle temperature was found to break

clusters of H<sub>2</sub>O molecules, simulated annealing runs involving water used a starting temperature of 298 K and a mid-cycle temperature of 373 K. The simulations used a Nosé thermostat with a Q ratio of 0.01. The configurations obtained at the end of each cycle were optimised, and five low-energy configurations were extracted manually from the total set of 100 configurations (5 simulated annealing runs with 20 cycles each).

MD simulations of TCS diffusion through all-silica zeolites were carried out for a temperature of 298 K, sampling a total duration of 50 ns using a timestep of 0.5 fs. In these simulations, the zeolite frameworks were treated as fully flexible. These simulations, which started from the low-energy configurations obtained in the simulated annealing runs, also used a Nosé thermostat with a Q ratio of 0.01. Self-diffusion coefficients were computed from the mean square displacements of TCS using the Einstein relation.

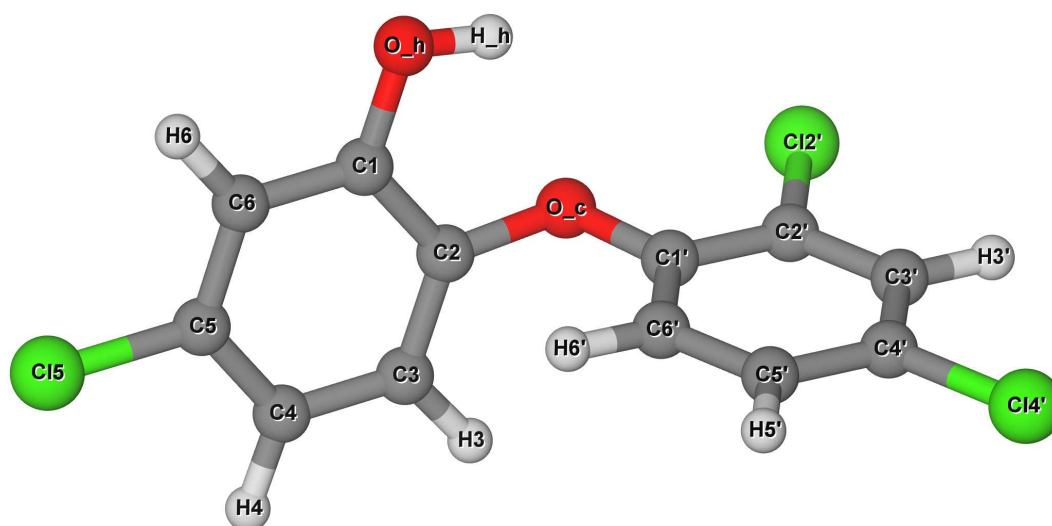

**Figure S1:** TCS molecule with atom labels used in **Table S1**. Labels are consistent with the crystal structure reported by Ramos et al.,<sup>3</sup> with the exception of the hydroxyl group and the central oxygen atom, which were relabelled in the present work.

## Parameters of force field calculations

**Table S1:** Atom types and non-bonded *pcff* parameters used in force field calculations. TCS atom labels correspond to those displayed in **Figure S1**. Partial charges  $q$  and Lennard-Jones parameters  $R_0$  and  $D_0$  are given for each atom.

| TCS molecule                   | Atom type ( <i>pcff</i> ) | $q$ [ $e^-$ ]         | $R_0$ [ $\text{\AA}$ ] | $D_0$ [ $\text{kcal mol}^{-1}$ ] |
|--------------------------------|---------------------------|-----------------------|------------------------|----------------------------------|
| O_c                            | oc                        | -0.0530               | 3.530                  | 0.2400                           |
| O_h                            | oh                        | -0.4506               | 3.530                  | 0.2400                           |
| H_h                            | ho                        | 0.4241                | 1.098                  | 0.0130                           |
| C1, C2, C1'                    | cp                        | 0.0265                | 4.010                  | 0.0640                           |
| C3, C4, C6, C3', C5', C6'      | cp                        | -0.1268               | 4.010                  | 0.0640                           |
| C5, C2', C4'                   | cp                        | 0.1020                | 4.010                  | 0.0640                           |
| Cl5, Cl2', Cl4'                | cl                        | -0.1020               | 3.920                  | 0.2247                           |
| H3, H4, H6, H3', H5', H6'      | hc                        | 0.1268                | 2.995                  | 0.0200                           |
| <b>H<sub>2</sub>O molecule</b> |                           |                       |                        |                                  |
| O                              | o*                        | -0.7982               | 3.608                  | 0.2740                           |
| H                              | hw                        | 0.3991                | 1.098                  | 0.0130                           |
| <b>Zeolite</b>                 |                           |                       |                        |                                  |
| Si                             | sz                        | 0.5236 <sup>a)</sup>  | b)                     | b)                               |
| Al                             | az                        | 0.5366 <sup>a)</sup>  | b)                     | b)                               |
| O, Si-O-Si                     | oss                       | -0.2618 <sup>a)</sup> | 3.4506                 | 0.1622                           |
| O, Si-O-Al, no proton          | oas                       | -0.2959 <sup>a)</sup> | 5.2591                 | 0.0129                           |
| O, Si-O-Al, protonated         | ob                        | -0.2515 <sup>a)</sup> | 5.2191                 | 0.0135                           |
| H                              | hb                        | +1.0000               | 1.2149                 | 5.2302                           |

a) In H-FAU and H-MOR, charges on framework Si, Al, O atoms are slightly changed from the tabulated values to compensate the customised charge of +1 on the framework proton.

b) Si and Al are treated as non-interacting except for electrostatic interactions.

## Cell parameters of DFT-optimized zeolite structures

**Table S2:** Cell parameters of DFT-optimized zeolite structures. Cell multiplications used in setting up the supercells for guest@Zeol configurations are also included. References given in the last column correspond to publications from which the starting structures for the optimizations were taken.

| FTC   | Symmetry     | <i>a</i> [Å] | <i>b</i> [Å] | <i>c</i> [Å] | $\alpha$ [°] | $\beta$ [°] | $\gamma$ [°] | Supercell | Ref. |
|-------|--------------|--------------|--------------|--------------|--------------|-------------|--------------|-----------|------|
| AFI   | $P3_1$       | 13.671       | 13.671       | 8.328        | 90           | 90          | 120          | a)        | 4    |
| IFR   | $C2/m^b$     | 18.629       | 13.496       | 7.631        | 90           | 78.38       | 90           | 1×2×3     | 5    |
| MOR   | $Cmc2_1$     | 18.061       | 20.209       | 7.455        | 90           | 90          | 90           | 1×1×3     | 6    |
| BEA   | $P4_122$     | 12.470       | 12.470       | 26.331       | 90           | 90          | 90           | 2×2×1     | 7    |
| FAU   | $Fd\bar{3}m$ | 24.258       | 24.258       | 24.258       | 90           | 90          | 90           | 1×1×1     | 8    |
| CFI   | $P1$         | 13.695       | 5.021        | 25.497       | 90           | 90          | 90           | 2×4×1     | 9    |
| H-FAU | $P1$         | 24.258       | 24.258       | 24.258       | 90           | 90          | 90           | 1×1×1     | 8    |
| H-MOR | $P1$         | 18.061       | 20.209       | 22.364       | 90           | 90          | 120          | 1×1×1     | 6    |

a) An orthogonal supercell was constructed using the following transformations:

$$\vec{a}_{ortho} = 2 \cdot \vec{a}_{hex} + \vec{b}_{hex} \quad \vec{b}_{ortho} = \vec{b}_{hex} \quad \vec{c}_{ortho} = 3 \cdot \vec{c}_{hex}$$

b) Changed cell setting with respect to original publication

## Comparison of proton positions in H-FAU

**Table S3:** Total energies and relative energies with respect to lowest-energy model for H-FAU models with the proton bonded to different O atoms. The last column indicates whether the proton is accessible to guest molecules.

| Proton location | $E_{total}$ [Ha] | $E_{rel}$ [kJ mol <sup>-1</sup> ] | Accessible?                                                      |
|-----------------|------------------|-----------------------------------|------------------------------------------------------------------|
| H@O1            | -6947.10406      | 5.4                               | Yes (pointing into 12MR)                                         |
| H@O2            | -6947.10611      | 0                                 | No (pointing into 6MR connecting <i>sod</i> and <i>d6r</i> cage) |
| H@O3            | -6947.10204      | 10.7                              | Yes (pointing into 6MR bordering the FAU supercage)              |
| H@O4            | -6947.10137      | 12.4                              | Yes (pointing into 12MR)                                         |

## Comparison of Al sites and proton positions in H-MOR

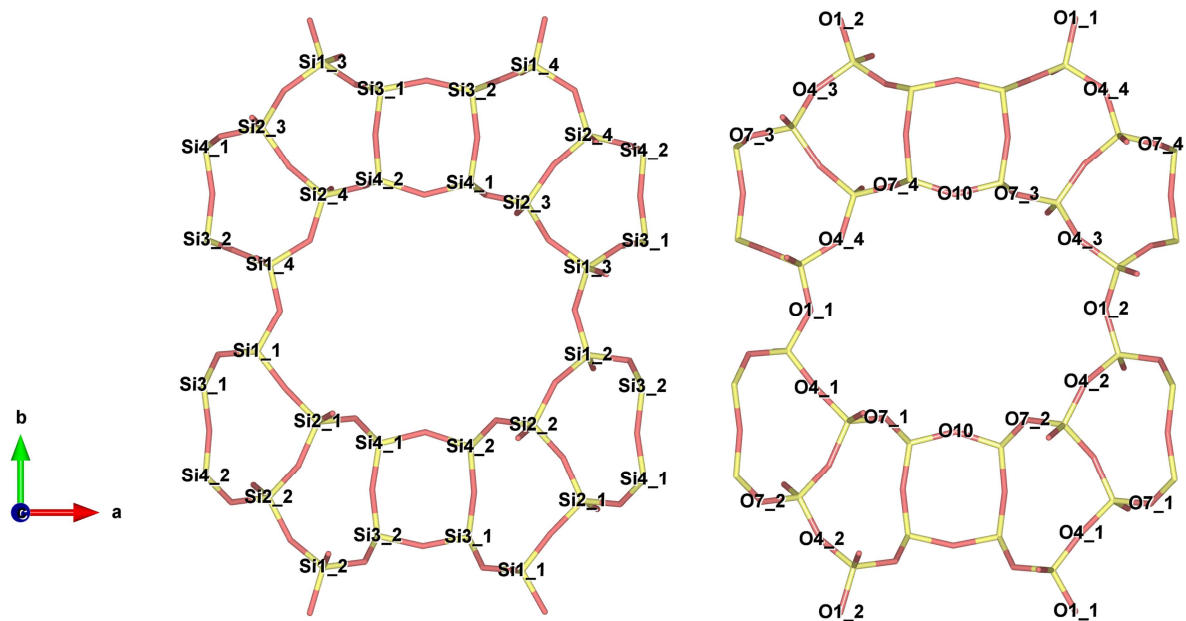

**Figure S2:** Surroundings of one 12MR channel in all-silica MOR (symmetry:  $P2_12_12_1$ ) including labels of Si atoms (left panel) and O atoms (right panel). Only those O atoms that constitute the channel wall are labeled.

**Table S4:** Total energies and relative energies with respect to lowest-energy model for different H-MOR models. Different Al sites and proton positions were considered, limiting the choice to those cases where the proton is located at the wall of the 12MR channel.

| Al site | Proton location | $E_{total}$ [Ha] | $E_{rel}$ [kJ mol <sup>-1</sup> ] |
|---------|-----------------|------------------|-----------------------------------|
| Al@T1_1 | H@O1_1          | -5210.15911      | 7.8                               |
| Al@T1_1 | H@O4_1          | -5210.15251      | 25.1                              |
| Al@T1_2 | H@O1_2          | -5210.15531      | 17.8                              |
| Al@T1_2 | H@O4_2          | -5210.15823      | 10.1                              |
| Al@T1_3 | H@O1_2          | -5210.15720      | 12.8                              |
| Al@T1_3 | H@O4_3          | -5210.15993      | 5.7                               |
| Al@T1_4 | H@O1_1          | -5210.15896      | 8.2                               |
| Al@T1_4 | H@O4_4          | -5210.16208      | 0                                 |
| Al@T2_1 | H@O4_1          | -5210.15690      | 13.6                              |
| Al@T2_1 | H@O7_1          | -5210.16012      | 5.2                               |
| Al@T2_2 | H@O4_2          | -5210.15644      | 14.8                              |
| Al@T2_2 | H@O7_2          | -5210.15930      | 7.3                               |
| Al@T2_3 | H@O4_3          | -5210.15633      | 15.1                              |
| Al@T2_3 | H@O7_3          | -5210.15763      | 11.7                              |
| Al@T2_4 | H@O4_4          | -5210.15987      | 5.8                               |
| Al@T2_4 | H@O7_4          | -5210.15819      | 10.2                              |
| Al@T4_1 | H@O7_1          | -5210.15718      | 12.9                              |
| Al@T4_1 | H@O7_3          | -5210.15972      | 6.2                               |
| Al@T4_1 | H@O10           | -5210.15554      | 17.2                              |
| Al@T4_2 | H@O7_2          | -5210.15673      | 14.1                              |
| Al@T4_2 | H@O7_4          | -5210.15819      | 10.2                              |
| Al@T4_2 | H@O10           | -5210.15624      | 15.4                              |

## Adsorption energies from DFT optimisations

**Table S5:** Adsorption energies  $\Delta E_{ads}$  and deformation energies calculated for TCS@Zeo complexes (all values in  $\text{kJ mol}^{-1}$ ). For each configuration, adsorption energies obtained with DZVP-MOLOPT-SR basis sets and with TZVP-MOLOPT basis sets are included. Lowest-energy configurations (TZVP) are highlighted in bold.

|                       | $\Delta E_{ads}$<br>(DZVP-SR) | $\Delta E_{ads}$<br>(TZVP) | $\Delta E_{deform,Zeo}$<br>(TZVP) | $\Delta E_{deform,TCS}$<br>(TZVP) |
|-----------------------|-------------------------------|----------------------------|-----------------------------------|-----------------------------------|
| <b>BEA, Config1</b>   | <b>-179.2</b>                 | <b>-156.2</b>              | <b>1.8</b>                        | <b>2.6</b>                        |
| BEA, Config2          | -179.7                        | -155.5                     | 1.7                               | 1.2                               |
| BEA, Config3          | -161.7                        | -132.6                     | 1.6                               | 9.1                               |
| BEA, Config4          | -169.8                        | -146.0                     | 1.5                               | 2.5                               |
| BEA, Config5          | -152.5                        | -126.5                     | 1.6                               | 11.2                              |
| FAU, Config1          | -146.8                        | -120.3                     | 2.1                               | 3.7                               |
| FAU, Config2          | -144.9                        | -120.4                     | 3.2                               | 1.5                               |
| <b>FAU, Config3</b>   | <b>-149.5</b>                 | <b>-124.1</b>              | <b>2.7</b>                        | <b>1.4</b>                        |
| FAU, Config4          | -132.0                        | -105.5                     | 2.8                               | 13.4                              |
| FAU, Config5          | -130.4                        | -106.2                     | 2.8                               | 3.4                               |
| <b>AFI, Config1</b>   | <b>-181.3</b>                 | <b>-156.2</b>              | <b>1.5</b>                        | <b>1.6</b>                        |
| AFI, Config2          | -179.9                        | -154.5                     | 1.5                               | 2.5                               |
| AFI, Config3          | -176.4                        | -149.0                     | 2.2                               | 3.3                               |
| AFI, Config4          | -167.2                        | -138.7                     | 1.1                               | 17.4                              |
| AFI, Config5          | -161.9                        | -131.0                     | 1.0                               | 17.8                              |
| <b>IFR, Config1</b>   | <b>-190.4</b>                 | <b>-160.4</b>              | <b>3.7</b>                        | <b>3.0</b>                        |
| IFR, Config2          | -190.9                        | -159.7                     | 4.7                               | 3.1                               |
| IFR, Config3          | -173.7                        | -143.7                     | 2.4                               | 5.1                               |
| IFR, Config4          | -181.4                        | -150.1                     | 4.8                               | 4.2                               |
| IFR, Config5          | -181.9                        | -151.6                     | 4.0                               | 5.9                               |
| MOR, Config1          | -183.8                        | -151.4                     | 4.7                               | 5.9                               |
| MOR, Config2          | -182.4                        | -153.3                     | 1.8                               | 5.3                               |
| MOR, Config3          | -187.2                        | -154.6                     | 4.9                               | 4.8                               |
| <b>MOR, Config4</b>   | <b>-185.5</b>                 | <b>-155.3</b>              | <b>5.4</b>                        | <b>4.6</b>                        |
| MOR, Config5          | -171.6                        | -139.2                     | 4.0                               | 23.2                              |
| <b>CFI, Config1</b>   | <b>-193.5</b>                 | <b>-153.8</b>              | <b>1.7</b>                        | <b>2.0</b>                        |
| CFI, Config2          | -199.7                        | -151.6                     | 4.9                               | 2.1                               |
| CFI, Config3          | -180.1                        | -152.2                     | 2.6                               | 2.5                               |
| CFI, Config4          | -180.2                        | -134.2                     | 4.3                               | 16.1                              |
| CFI, Config5          | -178.8                        | -134.7                     | 3.3                               | 16.6                              |
| H-FAU, Config1        | -156.2                        | -129.5                     | 12.5                              | 26.0                              |
| H-FAU, Config2        | -173.4                        | -140.7                     | 19.6                              | 23.4                              |
| H-FAU, Config3        | -158.3                        | -133.7                     | 14.3                              | 21.9                              |
| <b>H-FAU, Config4</b> | <b>-182.5</b>                 | <b>-153.7</b>              | <b>19.5</b>                       | <b>5.5</b>                        |
| H-FAU, Config5        | -166.3                        | -142.5                     | 10.7                              | 9.3                               |
| H-MOR, Config1        | -217.0                        | -181.7                     | 14.9                              | 23.0                              |
| <b>H-MOR, Config2</b> | <b>-222.9</b>                 | <b>-191.4</b>              | <b>11.1</b>                       | <b>12.6</b>                       |
| H-MOR, Config3        | -217.9                        | -187.4                     | 15.0                              | 12.7                              |
| H-MOR, Config4        | -201.2                        | -171.1                     | 9.7                               | 17.0                              |
| H-MOR, Config5        | -191.7                        | -160.3                     | 9.0                               | 32.2                              |



**Table S6:** Adsorption energies  $\Delta E_{ads}$ , zeolite deformation energies and guest-guest interaction energies calculated for  $8\text{H}_2\text{O}@Zeo$  complexes (all values in  $\text{kJ mol}^{-1}$ ). Adsorption energies obtained with DZVP-MOLOPT-SR basis sets and with TZVP-MOLOPT basis sets are given for the whole  $(\text{H}_2\text{O})_8$  cluster and per  $\text{H}_2\text{O}$  molecule. Lowest-energy configurations (TZVP) are highlighted in bold. For H-FAU and H-MOR, the proton transfer from the framework to the  $\text{H}_2\text{O}$  cluster precludes a meaningful calculation of the deformation energies.

|                       | $\Delta E_{ads}$ 8/1 $\text{H}_2\text{O}$<br>(DZVP-SR) | $\Delta E_{ads}$ 8/1 $\text{H}_2\text{O}$<br>(TZVP) | $\Delta E_{deform,Zeo}$<br>(TZVP) | $\Delta E_{guest-guest,H_2O}$<br>(TZVP) |
|-----------------------|--------------------------------------------------------|-----------------------------------------------------|-----------------------------------|-----------------------------------------|
| <b>FAU, Config1</b>   | <b>-406.7 / -50.8</b>                                  | <b>-390.5 / -48.8</b>                               | <b>5.4</b>                        | <b>-287.6</b>                           |
| FAU, Config2          | -407.7 / -51.0                                         | -389.2 / -48.7                                      | 6.2                               | -298.8                                  |
| FAU, Config3          | -407.6 / -51.0                                         | -388.6 / -48.6                                      | 6.1                               | -286.5                                  |
| FAU, Config4          | -406.1 / -50.8                                         | -388.5 / -48.6                                      | 5.0                               | -279.5                                  |
| FAU, Config5          | -405.9 / -50.7                                         | -389.1 / -48.6                                      | 5.6                               | -278.4                                  |
| <b>MOR, Config1</b>   | <b>-452.7 / -56.6</b>                                  | <b>-427.5 / -53.4</b>                               | <b>7.2</b>                        | <b>-291.1</b>                           |
| MOR, Config2          | -439.1 / -54.9                                         | -417.0 / -52.1                                      | 6.0                               | -293.7                                  |
| MOR, Config3          | -445.1 / -55.6                                         | -419.8 / -52.5                                      | 8.5                               | -293.3                                  |
| MOR, Config4          | -438.7 / -54.8                                         | -419.3 / -52.4                                      | 4.8                               | -288.7                                  |
| MOR, Config5          | -436.8 / -54.6                                         | -417.2 / -52.1                                      | 5.5                               | -282.0                                  |
| H-FAU, Config1        | -499.7 / -62.5                                         | -464.8 / -58.1                                      |                                   |                                         |
| <b>H-FAU, Config2</b> | <b>-511.1 / -63.9</b>                                  | <b>-479.1 / -59.9</b>                               |                                   |                                         |
| H-FAU, Config3        | -507.5 / -63.4                                         | -473.5 / -59.2                                      |                                   |                                         |
| H-FAU, Config4        | -496.5 / -62.1                                         | -466.5 / -58.3                                      |                                   |                                         |
| H-FAU, Config5        | -479.6 / -60.0                                         | -447.7 / -56.0                                      |                                   |                                         |
| H-MOR, Config1        | -519.5 / -64.9                                         | -484.8 / -60.6                                      |                                   |                                         |
| <b>H-MOR, Config2</b> | <b>-525.8 / -65.7</b>                                  | <b>-494.7 / -61.8</b>                               |                                   |                                         |
| H-MOR, Config3        | -527.3 / -65.9                                         | -491.3 / -61.4                                      |                                   |                                         |
| H-MOR, Config4        | -515.8 / -64.5                                         | -484.0 / -60.5                                      |                                   |                                         |
| H-MOR, Config5        | -510.0 / -63.7                                         | -477.4 / -59.7                                      |                                   |                                         |

**Table S7:** Adsorption energies  $\Delta E_{ads}$  calculated for  $NH_2O @Zeo$  complexes with  $N = 1, 4, 12$ . Results obtained with DZVP-MOLOPT-SR basis sets and with TZVP-MOLOPT basis sets are given (all values in  $\text{kJ mol}^{-1}$  and per  $H_2O$  molecule).

|                | 1 $H_2O$<br>(DZVP-SR) | 1 $H_2O$<br>(TZVP) | 4 $H_2O$<br>(DZVP-SR) | 4 $H_2O$<br>(TZVP) | 12 $H_2O$<br>(DZVP-SR) | 12 $H_2O$<br>(TZVP) |
|----------------|-----------------------|--------------------|-----------------------|--------------------|------------------------|---------------------|
| FAU, Config1   | -31.3                 | -24.6              | -47.6                 | -44.6              | -54.3                  | -52.1               |
| FAU, Config2   | -16.7                 | -15.0              | -45.9                 | -43.8              | -51.9                  | -50.2               |
| FAU, Config3   | -17.2                 | -15.3              | -46.6                 | -43.1              | -53.9                  | -51.9               |
| FAU, Config4   | -31.1                 | -25.8              | -46.1                 | -43.7              | -53.8                  | -51.4               |
| FAU, Config5   | -20.7                 | -16.6              | -46.9                 | -44.0              | -52.0                  | -49.7               |
| MOR, Config1   | -43.9                 | -37.5              | -49.1                 | -46.8              | -57.3                  | -54.9               |
| MOR, Config2   | -43.1                 | -38.5              | -49.2                 | -47.1              | -56.0                  | -53.4               |
| MOR, Config3   | -45.8                 | -38.4              | -49.1                 | -46.4              | -57.7                  | -53.6               |
| MOR, Config4   | -33.7                 | -24.3              | -50.5                 | -47.3              | -55.3                  | -52.9               |
| MOR, Config5   | -19.2                 | -17.6              | -49.3                 | -47.2              | -54.6                  | -51.4               |
| H-FAU, Config1 | -89.3                 | -86.1              | -62.0                 | -57.1              | -60.8                  | -57.7               |
| H-FAU, Config2 | -89.3                 | -86.2              | -62.2                 | -58.1              | -61.5                  | -58.1               |
| H-FAU, Config3 | -89.3                 | -85.5              | -63.2                 | -58.3              | -59.4                  | -56.3               |
| H-FAU, Config4 | -89.5                 | -86.0              | -72.5                 | -68.5              | -57.1                  | -54.0               |
| H-FAU, Config5 | -79.7                 | -74.4              | -68.8                 | -64.1              | -61.2                  | -57.5               |
| H-MOR, Config1 | -88.6                 | -85.2              | -71.3                 | -66.8              | -64.5                  | -60.2               |
| H-MOR, Config2 | -89.6                 | -85.1              | -64.0                 | -62.6              | -69.0                  | -64.6               |
| H-MOR, Config3 | -89.3                 | -85.9              | -71.8                 | -67.3              | -64.5                  | -60.4               |
| H-MOR, Config4 | -89.7                 | -86.6              | -64.0                 | -60.1              | -63.0                  | -59.4               |
| H-MOR, Config5 | -89.4                 | -84.5              | -76.5                 | -71.8              | -68.2                  | -63.7               |

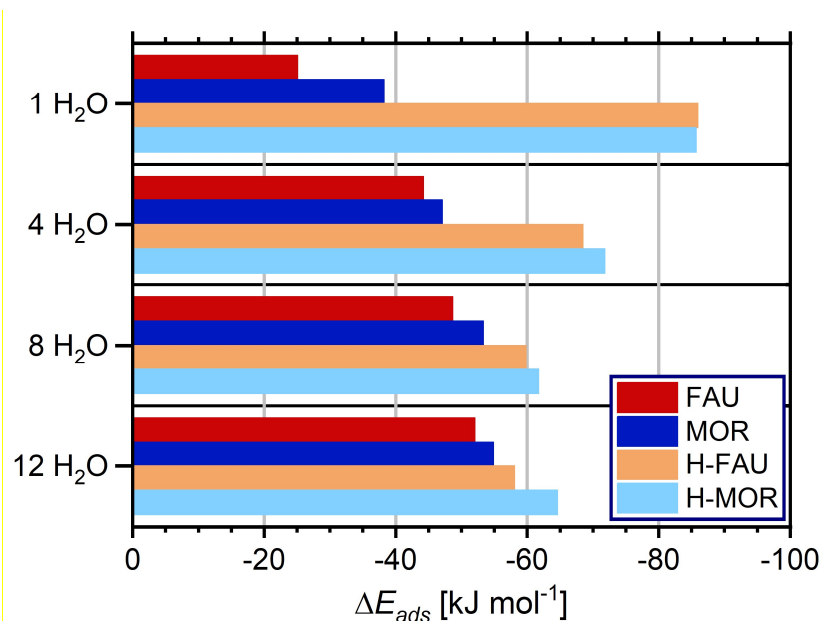

**Figure S3:** Boltzmann-weighted adsorption energies obtained for clusters of  $H_2O$  molecules of different size. All results are given per  $H_2O$  molecule.

**Table S8:** Adsorption energies  $\Delta E_{ads}$  calculated for all-silica FAU and MOR with co-adsorbed TCS and water (all values in  $\text{kJ mol}^{-1}$ ). As described in the main text, the label at the top indicates the order in which the species were added in the preliminary MC simulations.

|                     | 8H <sub>2</sub> O@(TCS@Zeolite) |                            | TCS@(8H <sub>2</sub> O@Zeolite) |                            |
|---------------------|---------------------------------|----------------------------|---------------------------------|----------------------------|
|                     | $\Delta E_{ads}$<br>(DZVP-SR)   | $\Delta E_{ads}$<br>(TZVP) | $\Delta E_{ads}$<br>(DZVP-SR)   | $\Delta E_{ads}$<br>(TZVP) |
| FAU, Config1        | -574.6                          | -537.0                     | -562.6                          | -525.6                     |
| <b>FAU, Config2</b> | <b>-602.5</b>                   | <b>-558.3</b>              | -578.1                          | -544.0                     |
| FAU, Config3        | -569.6                          | -528.6                     | -564.4                          | -524.5                     |
| FAU, Config4        | -595.0                          | -554.3                     | -562.4                          | -530.9                     |
| FAU, Config5        | -564.8                          | -531.1                     | -587.5                          | -546.9                     |
| MOR, Config1        | -644.7                          | -585.1                     | -626.6                          | -570.7                     |
| <b>MOR, Config2</b> | <b>-645.7</b>                   | <b>-591.1</b>              | -645.8                          | -590.6                     |
| MOR, Config3        | -618.4                          | -561.4                     | -638.4                          | -581.3                     |
| MOR, Config4        | -636.2                          | -584.9                     | -633.6                          | -579.8                     |
| MOR, Config5        | -624.1                          | -563.1                     | -651.3                          | -595.7                     |

## Additional results of AIMD simulations

**Table S9:** Average kinetic and potential energies from production stages of individual AIMD trajectories. The average temperature and its standard deviation are also given.

|                                      | $\bar{E}_{kin}$ [Ha] | $\bar{E}_{pot}$ [Ha] | $T$ [K]    |
|--------------------------------------|----------------------|----------------------|------------|
| TCS, Traj1                           | 0.03264              | -149.46422           | 298.8±47.2 |
| TCS, Traj2                           | 0.03286              | -149.46712           | 300.8±48.5 |
| TCS, Traj3                           | 0.03278              | -149.46470           | 300.0±47.9 |
| FAU, Traj1                           | 0.81161              | -6947.54685          | 297.7±10.1 |
| FAU, Traj2                           | 0.81086              | -6947.54690          | 297.4±9.9  |
| FAU, Traj3                           | 0.81235              | -6947.54549          | 297.9±10.1 |
| TCS@FAU, Traj1                       | 0.84636              | -7097.05570          | 297.9±10.1 |
| TCS@FAU, Traj2                       | 0.84544              | -7097.06082          | 297.6±9.7  |
| TCS@FAU, Traj3                       | 0.84631              | -7097.05857          | 297.9±9.7  |
| MOR, Traj1                           | 0.60821              | -5210.79884          | 297.8±11.6 |
| MOR, Traj2                           | 0.60794              | -5210.80111          | 297.6±11.5 |
| MOR, Traj3                           | 0.60790              | -5210.80042          | 297.6±11.6 |
| TCS@MOR, Traj1                       | 0.64283              | -5360.33160          | 298.1±11.2 |
| TCS@MOR, Traj2                       | 0.64155              | -5360.33281          | 297.5±12.1 |
| TCS@MOR, Traj3                       | 0.64284              | -5360.32761          | 298.1±11.4 |
| H-FAU, Traj1                         | 0.81569              | -6946.27213          | 298.6±9.8  |
| H-FAU, Traj2                         | 0.81522              | -6946.27263          | 298.5±10.0 |
| H-FAU, Traj3                         | 0.81054              | -6946.27684          | 296.8±9.9  |
| TCS@H-FAU, Traj1                     | 0.85045              | -7095.79736          | 298.9±9.4  |
| TCS@H-FAU, Traj2                     | 0.84834              | -7095.79923          | 298.1±9.8  |
| TCS@H-FAU, Traj3                     | 0.84653              | -7095.80119          | 297.5±9.7  |
| H-MOR, Traj1                         | 0.61036              | -5209.53489          | 298.1±11.6 |
| H-MOR, Traj2                         | 0.61049              | -5209.53634          | 298.2±11.6 |
| H-MOR, Traj3                         | 0.60972              | -5209.53790          | 297.8±11.8 |
| TCS@H-MOR, Traj1                     | 0.63987              | -5359.08286          | 296.1±10.7 |
| TCS@H-MOR, Traj2                     | 0.64578              | -5359.07707          | 298.8±11.6 |
| TCS@H-MOR, Traj3                     | 0.64342              | -5359.08126          | 297.7±11.8 |
| 8H <sub>2</sub> O@(TCS@H-FAU), Traj1 | 0.88091              | -7233.82590          | 297.7±9.9  |
| 8H <sub>2</sub> O@(TCS@H-FAU), Traj2 | 0.88074              | -7233.81923          | 297.6±9.8  |
| 8H <sub>2</sub> O@(TCS@H-FAU), Traj3 | 0.88150              | -7233.82807          | 297.9±9.6  |
| 8H <sub>2</sub> O@(TCS@H-MOR), Traj1 | 0.67759              | -5497.12562          | 297.8±10.9 |
| 8H <sub>2</sub> O@(TCS@H-MOR), Traj2 | 0.67980              | -5497.12464          | 298.8±11.2 |
| 8H <sub>2</sub> O@(TCS@H-MOR), Traj3 | 0.68060              | -5497.12304          | 299.1±11.2 |

**Table S10:** Adsorption energies  $\Delta E_{ads}$  computed from DFT-optimised low-energy frames of AIMD trajectories for  $8\text{H}_2\text{O}@(\text{TCS}@Z\text{eo})$  systems (all values in  $\text{kJ mol}^{-1}$ ).

|                                                         | $\Delta E_{ads}$<br>(DZVP-SR) | $\Delta E_{ads}$<br>(TZVP) |
|---------------------------------------------------------|-------------------------------|----------------------------|
| $8\text{H}_2\text{O}@(\text{TCS}@H\text{-FAU})$ , Traj1 | -654.6                        | -613.6                     |
| $8\text{H}_2\text{O}@(\text{TCS}@H\text{-FAU})$ , Traj2 | -650.0                        | -597.9                     |
| $8\text{H}_2\text{O}@(\text{TCS}@H\text{-FAU})$ , Traj3 | -667.2                        | -601.4                     |
| $8\text{H}_2\text{O}@(\text{TCS}@H\text{-MOR})$ , Traj1 | -762.8                        | -685.7                     |
| $8\text{H}_2\text{O}@(\text{TCS}@H\text{-MOR})$ , Traj2 | -751.1                        | -678.9                     |
| $8\text{H}_2\text{O}@(\text{TCS}@H\text{-MOR})$ , Traj3 | -755.7                        | -687.6                     |

**Table S11:** Average angles  $\omega_{phenyl}$  between TCS phenyl rings from production stages of individual AIMD trajectories and their standard deviations.

|                | $\bar{\omega}_{phenyl}$<br>[°] | <i>StDev</i><br>[°] |                  | $\bar{\omega}_{phenyl}$<br>[°] | <i>StDev</i><br>[°] |
|----------------|--------------------------------|---------------------|------------------|--------------------------------|---------------------|
| TCS, Traj1     | 80.8                           | 20.5                |                  |                                |                     |
| TCS, Traj2     | 81.8                           | 17.2                |                  |                                |                     |
| TCS, Traj3     | 82.2                           | 23.7                |                  |                                |                     |
| TCS@FAU, Traj1 | 79.8                           | 13.3                | TCS@H-FAU, Traj1 | 78.8                           | 25.5                |
| TCS@FAU, Traj2 | 91.8                           | 16.2                | TCS@H-FAU, Traj2 | 86.3                           | 23.4                |
| TCS@FAU, Traj3 | 90.4                           | 17.5                | TCS@H-FAU, Traj3 | 81.4                           | 18.2                |
| TCS@MOR, Traj1 | 72.8                           | 25.5                | TCS@H-MOR, Traj1 | 16.8                           | 16.5                |
| TCS@MOR, Traj2 | 68.8                           | 18.8                | TCS@H-MOR, Traj2 | 21.4                           | 13.5                |
| TCS@MOR, Traj3 | 68.1                           | 16.7                | TCS@H-MOR, Traj3 | 29.0                           | 12.0                |

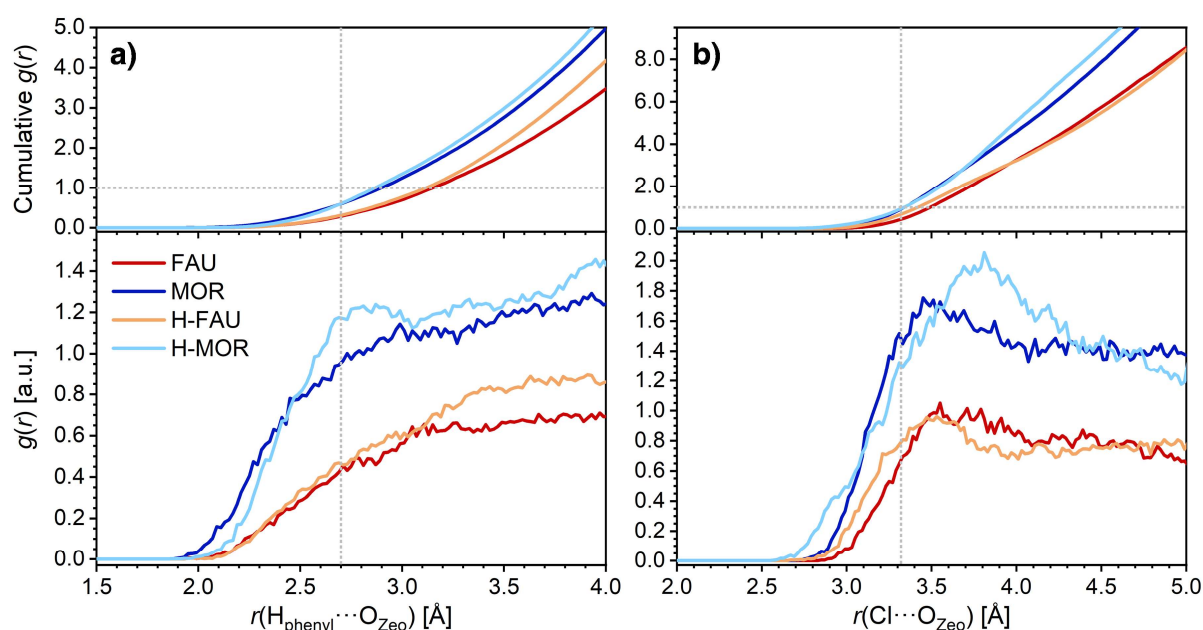

**Figure S4:** RDFs obtained from AIMD simulations. (a)  $\text{H}_{phenyl} \cdots \text{O}_{Zeo}$  contacts, (b)  $\text{Cl} \cdots \text{O}_{Zeo}$  contacts. The sums of the van der Waals radii are indicated as thin grey lines. Top panels show the cumulative RDFs.

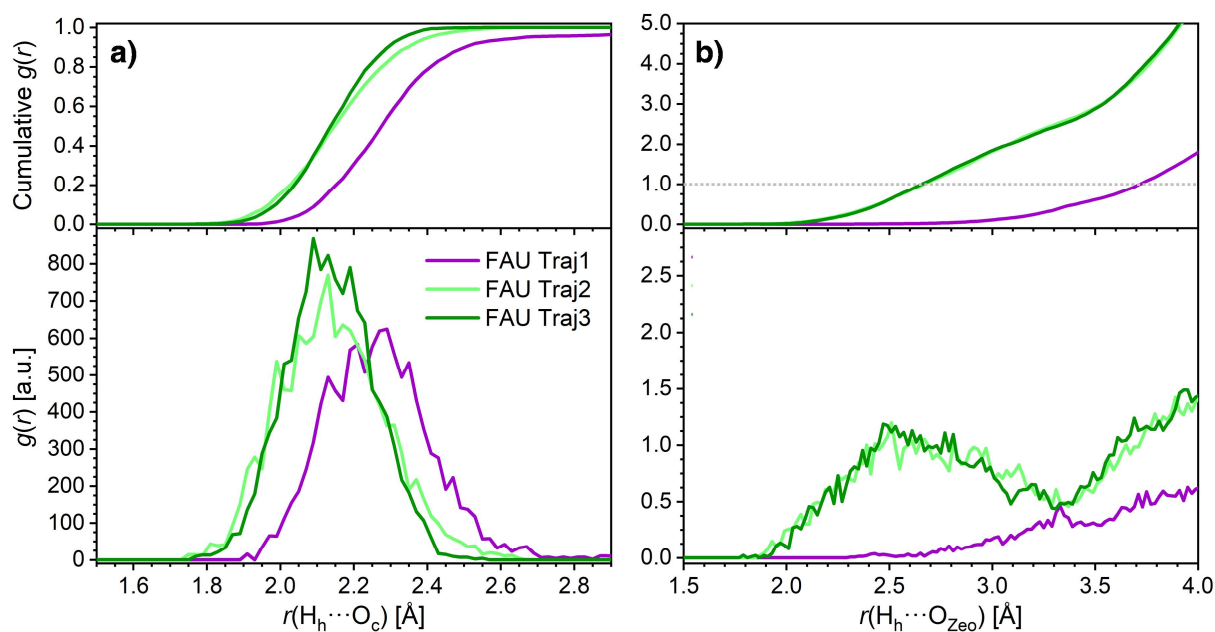

**Figure S5:** RDFs obtained from AIMD simulations for individual TCS@FAU trajectories. **(a)** Intramolecular hydrogen bonds of TCS, **(b)**  $H_h \cdots O_{zeo}$  hydrogen bonds. Top panels show the cumulative RDFs. Averages shown in the main paper were computed from Traj2 and Traj3.

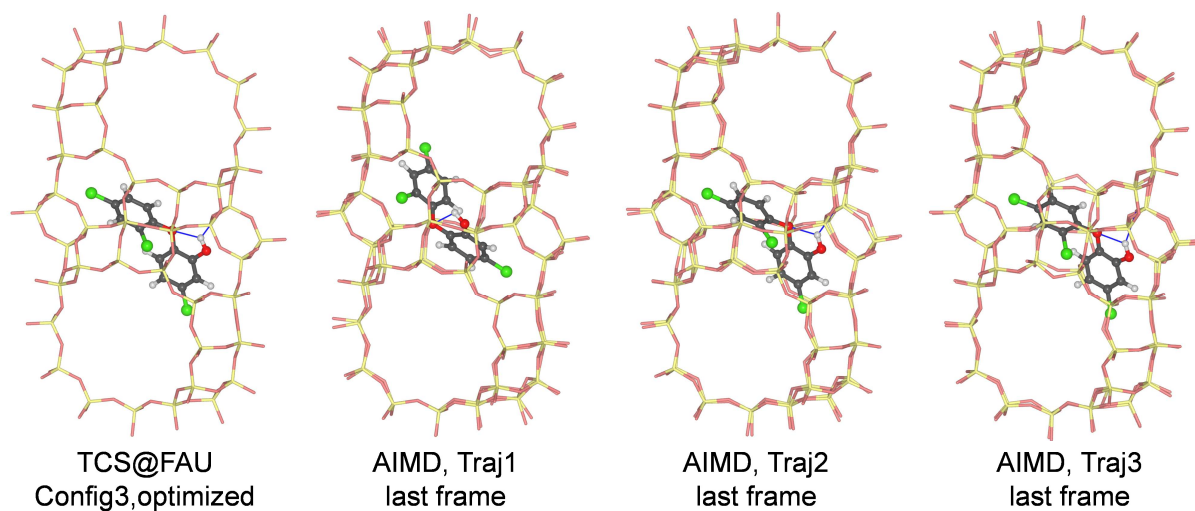

**Figure S6:** TCS@FAU adsorption configurations: Lowest-energy DFT-optimized structure (left panel) and last frames from three independent AIMD trajectories (remaining panels).

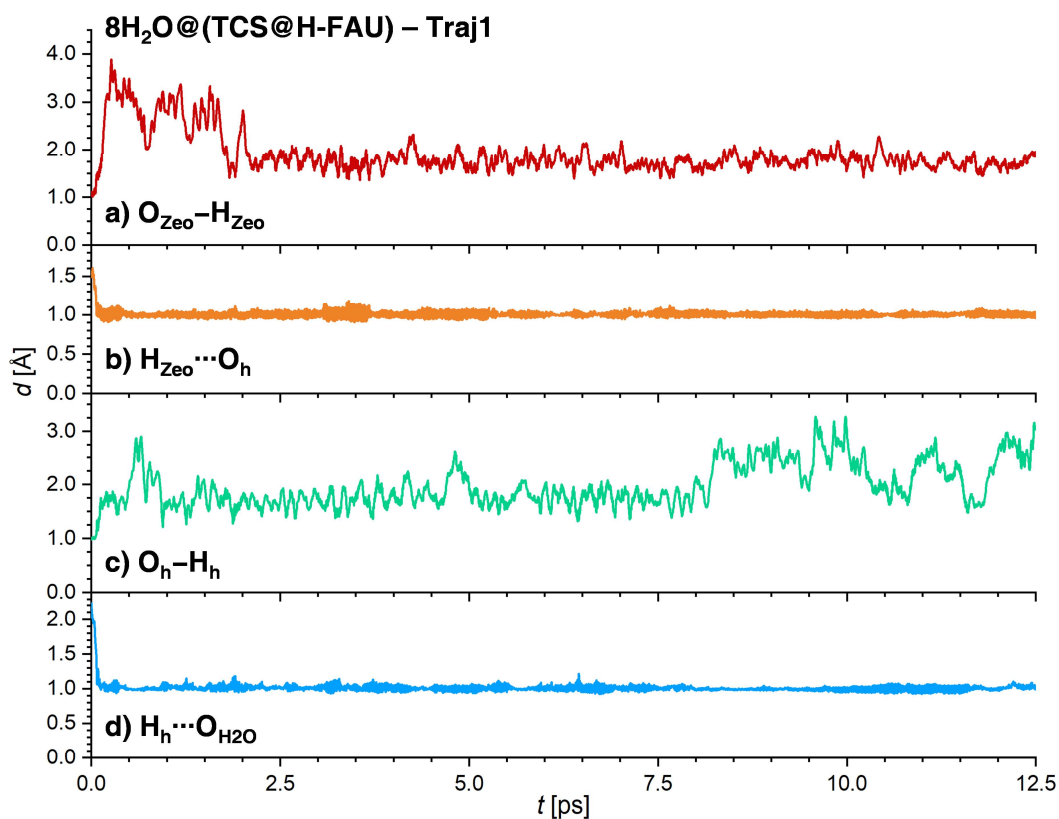

**Figure S7:** Evolution of selected interatomic distances for the entire AIMD trajectory Traj1 computed for 8H<sub>2</sub>O@(TCS@H-FAU)

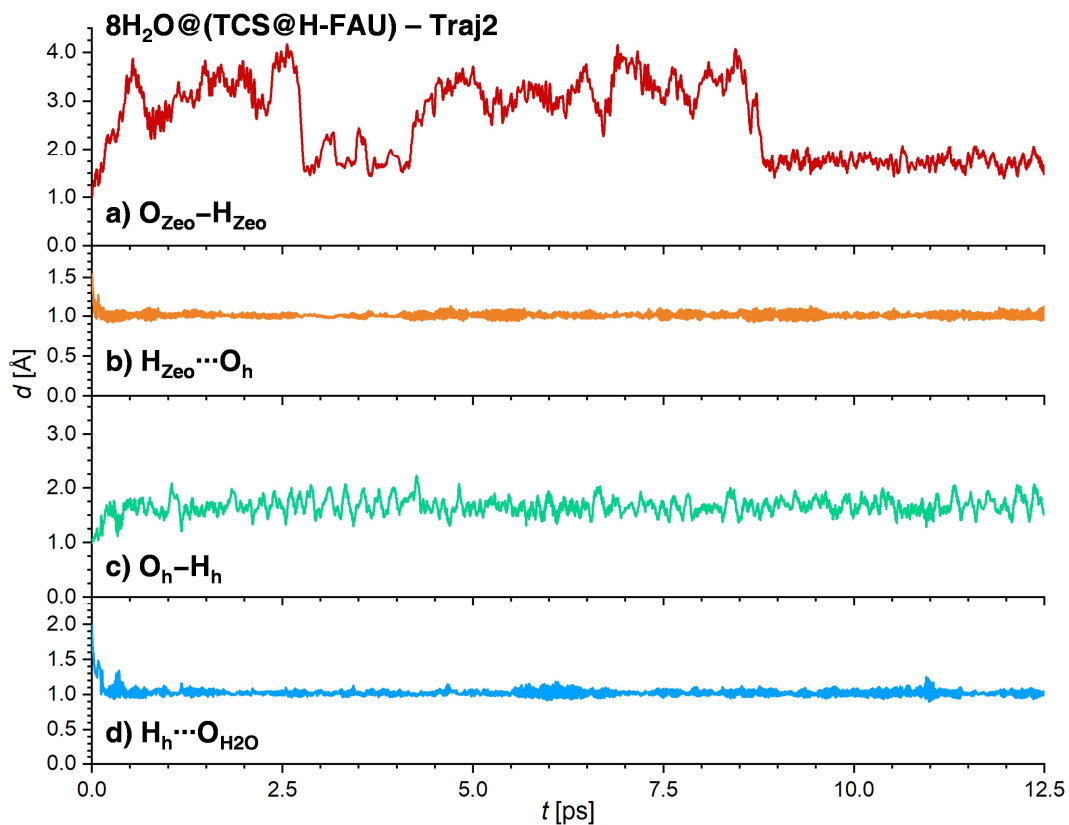

**Figure S8:** Evolution of selected interatomic distances for the entire AIMD trajectory Traj2 computed for 8H<sub>2</sub>O@(TCS@H-FAU)

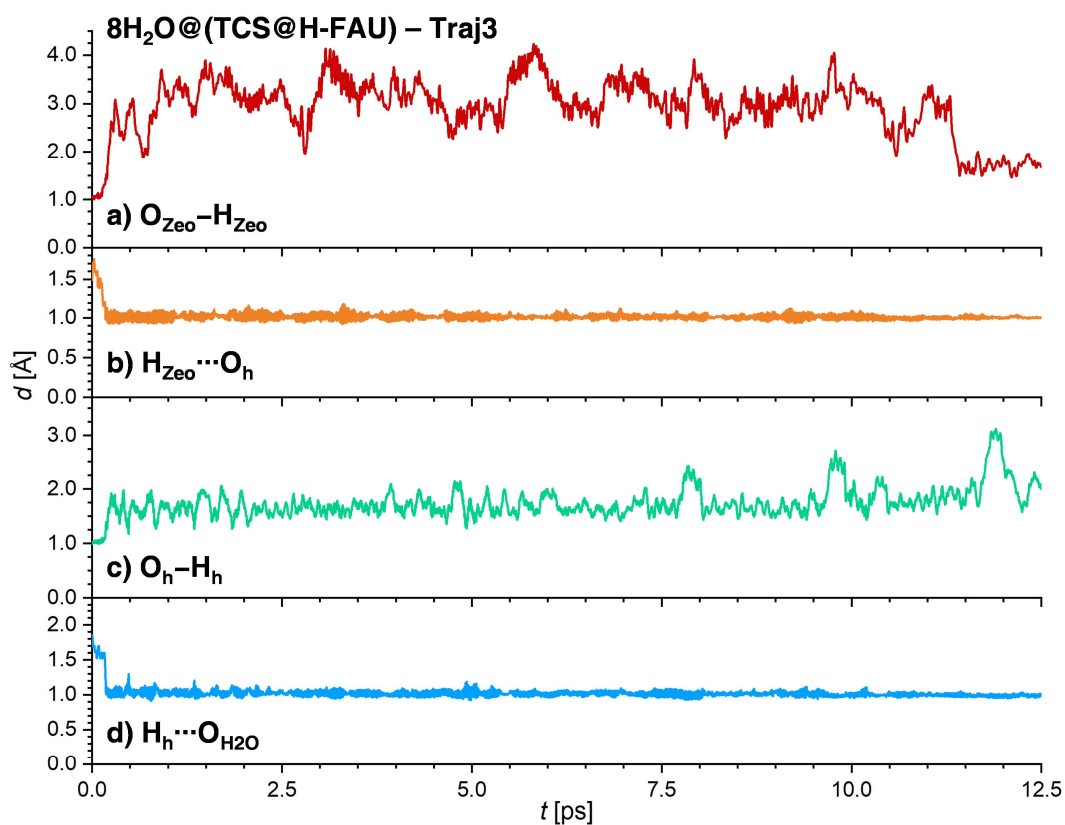

**Figure S9:** Evolution of selected interatomic distances for the entire AIMD trajectory Traj3 computed for 8H<sub>2</sub>O@(TCS@H-FAU)

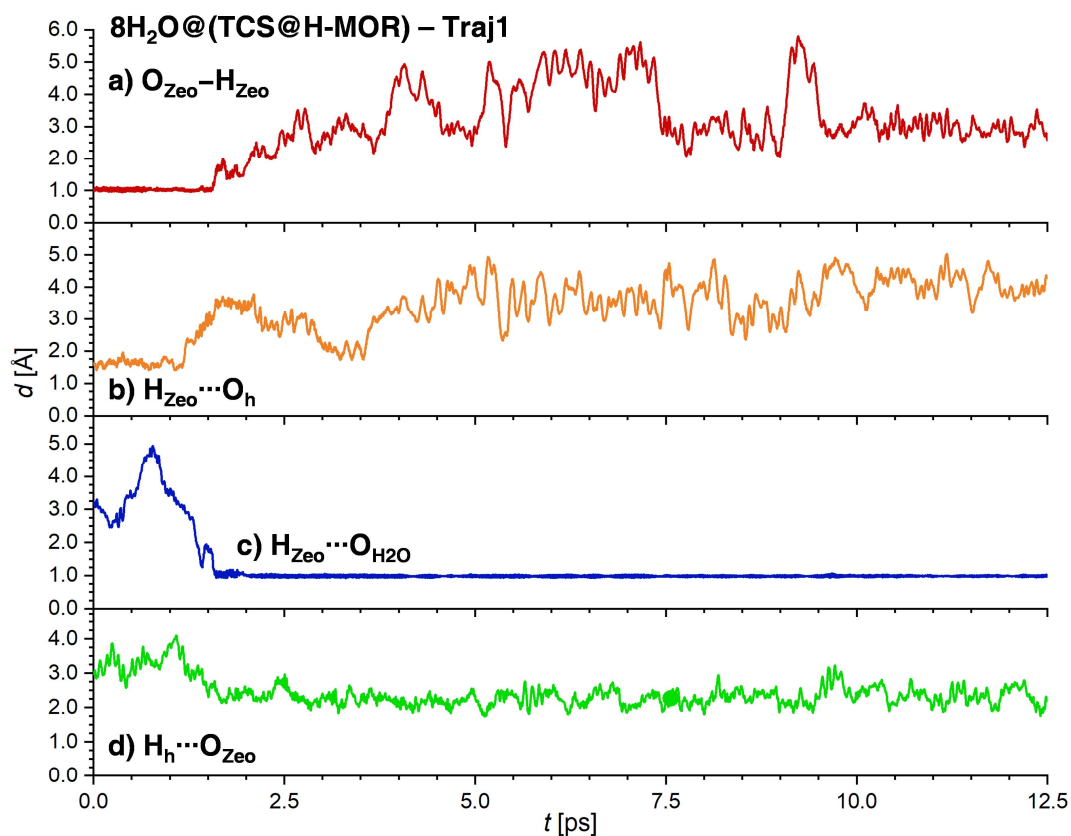

**Figure S10:** Evolution of selected interatomic distances for the entire AIMD trajectory Traj1 computed for 8H<sub>2</sub>O@(TCS@H-MOR)



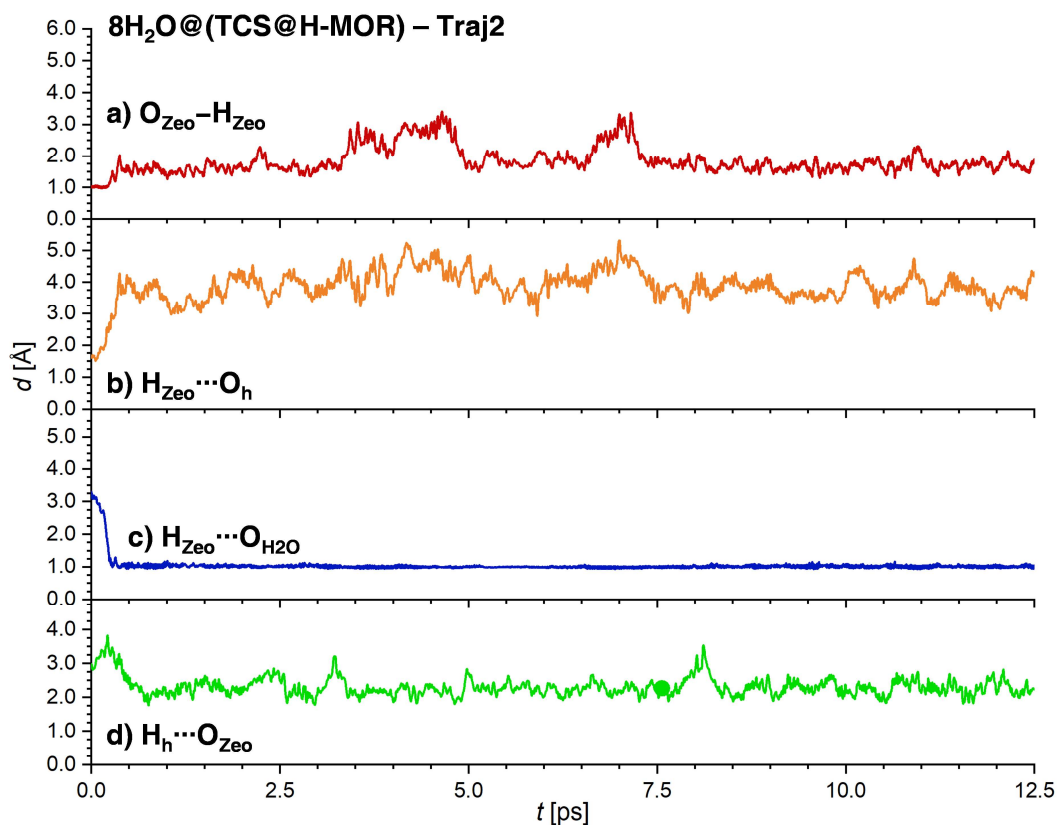

**Figure S11:** Evolution of selected interatomic distances for the entire AIMD trajectory Traj2 computed for  $8\text{H}_2\text{O}@(\text{TCS}@\text{H-MOR})$

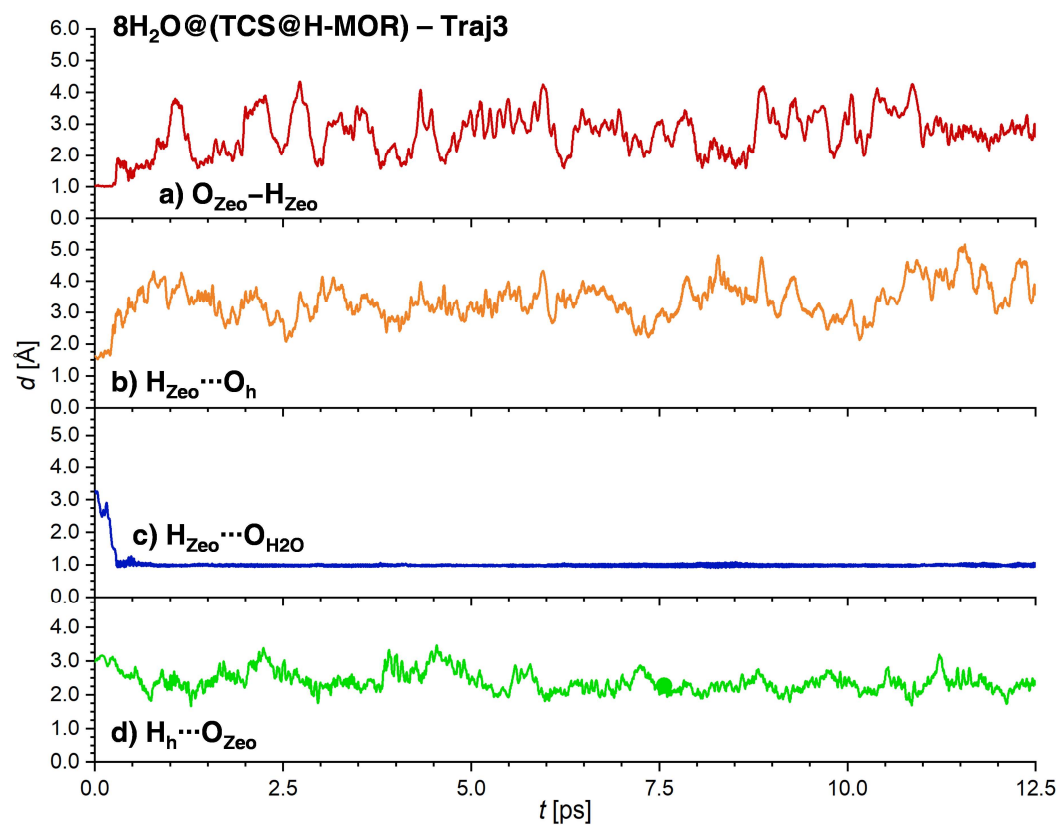

**Figure S12:** Evolution of selected interatomic distances for the entire AIMD trajectory Traj3 computed for  $8\text{H}_2\text{O}@(\text{TCS}@\text{H-MOR})$

## References

- 1 H. Sun, S. J. Mumby, J. R. Maple and A. T. Hagler, An ab Initio CFF93 All-Atom Force Field for Polycarbonates, *J. Am. Chem. Soc.*, 1994, **116**, 2978–2987.
- 2 M. Waldman and A. T. Hagler, New combining rules for rare gas van der Waals parameters, *J. Comput. Chem.*, 1993, **14**, 1077–1084.
- 3 A. I. Ramos, S. S. Braga and F. A. Almeida Paz, Triclosan, *Acta Crystallogr. Sect. C Cryst. Struct. Commun.*, 2009, **65**, o404–o405.
- 4 R. Bialek, W. M. Meier, M. Davis and M. J. Annen, The synthesis and structure of SSZ-24, the silica analog of AlPO<sub>4</sub>-5, *Zeolites*, 1991, **11**, 438–442.
- 5 P. A. Barrett, M. A. Camblor, A. Corma, R. H. Jones and L. A. Villaescusa, Structure of ITQ-4, a New Pure Silica Polymorph Containing Large Pores and a Large Void Volume, *Chem. Mater.*, 1997, **9**, 1713–1715.
- 6 R. Fantini, R. Arletti, S. Quartieri, M. Fabbiani, S. Morandi, G. Martra, F. Di Renzo and G. Vezzalini, Thermal behavior of high silica mordenite, *Microporous Mesoporous Mater.*, 2020, **294**, 109882.
- 7 J. B. Higgins, R. B. LaPierre, J. L. Schlenker, A. C. Rohrman, J. D. Wood, G. T. Kerr and W. J. Rohrbaugh, The framework topology of zeolite beta, *Zeolites*, 1988, **8**, 446–452.
- 8 J. A. Hriljac, M. M. Eddy, A. K. Cheetham, J. A. Donohue and G. J. Ray, Powder Neutron Diffraction and <sup>29</sup>Si MAS NMR Studies of Siliceous Zeolite-Y, *J. Solid State Chem.*, 1993, **106**, 66–72.
- 9 P. Wagner, M. Yoshikawa, M. Lovallo, K. Tsuji, M. Taspatsis and M. E. Davis, CIT-5: a high-silica zeolite with 14-ring pores, *Chem. Commun.*, 1997, 2179–2180.
